# Supplementary material
Source: PubMed Central journal article supplement (PMC5661291)
Supplement: ASN.2017020130SupplementaryData.pdf [file ASN.2017020130SupplementaryData.pdf]

**Table S1.** Patients characteristics

|                                    | All          | Control      | HTN          | DM           | HTN-CKD      | DKD          | p-value |
|------------------------------------|--------------|--------------|--------------|--------------|--------------|--------------|---------|
| N (%)                              | 95           | 19 (20%)     | 20 (21.1%)   | 17 (17.9%)   | 19 (20.0%)   | 20 (21.1%)   | -       |
| Age (years)                        | 63.6 ± 13.5  | 62.0 ± 9.7   | 64.1 ± 10.8  | 64.5 ± 12.7  | 59.3 ± 20.5  | 67.9 ± 10.8  | 0.363   |
| Gender (Male, N, %)                | 55 (57.9%)   | 11 (57.9%)   | 12 (60.0%)   | 10 (58.8%)   | 12 (63.2%)   | 10 (50.0%)   | 0.942   |
| Race (N, %)                        |              |              |              |              |              |              |         |
| African American                   | 36 (37.9%)   | 6 (35.3%)    | 7 (43.8%)    | 5 (41.7%)    | 11 (51.1%)   | 7 (36.8%)    |         |
| Caucasian                          | 19 (20.0%)   | 5 (29.4%)    | 5 (31.2%)    | 2 (16.7%)    | 2 (11.1%)    | 5 (26.3%)    | 0.825   |
| Hispanic                           | 6 (6.3%)     | 1 (5.9%)     | 1 (6.2%)     | 2 (16.7%)    | 1 (5.6%)     | 1 (5.3%)     |         |
| Asian                              | 5 (5.3%)     | 1 (5.9%)     | 1 (6.2%)     | 2 (16.7%)    | 0 (0.0%)     | 1 (5.3%)     |         |
| BMI (kg/m <sup>2</sup> )           | 29.8 ± 9.3   | 28.6 ± 6.3   | 35.0 ± 15.2  | 28.7 ± 4.7   | 25.0 ± 5.8   | 31.6 ± 7.9   | 0.014   |
| Systolic BP (mmHg)                 | 138.7 ± 24.8 | 128.7 ± 19.3 | 142.8 ± 35.7 | 134.0 ± 16.8 | 152.4 ± 24.3 | 134.5 ± 27.5 | 0.061   |
| Diastolic BP (mmHg)                | 78.1 ± 13.7  | 74.5 ± 12.8  | 79.2 ± 7.2   | 74.0 ± 11.4  | 87.4 ± 13.8  | 71.2 ± 12.7  | 0.010   |
| Serum albumin (g/dL)               | 4.0 ± 0.7    | 4.3 ± 0.4    | 4.1 ± 0.5    | 3.9 ± 0.6    | 4.1 ± 0.5    | 3.7 ± 0.9    | 0.051   |
| eGFR (mL/min/1.73 m <sup>2</sup> ) | 60.3 ± 29.8  | 85.5 ± 18.6  | 77.1 ± 15.4  | 78.4 ± 10.7  | 29.6 ± 21.7  | 33.3 ± 18.4  | <0.001  |

**Table S2.** Correlations of *PPARGC1A* with genes related to Notch signaling pathway  
(Microarray analysis using human kidney samples)

|               | Pearson's coefficient ( $\gamma$ ) | p-value |
|---------------|------------------------------------|---------|
| <i>NOTCH1</i> | -0.096                             | 0.353   |
| <i>NOTCH2</i> | -0.301                             | 0.003   |
| <i>NOTCH3</i> | -0.382                             | < 0.001 |
| <i>NOTCH4</i> | -0.102                             | 0.323   |
| <i>HES1</i>   | -0.399                             | < 0.001 |
| <i>HES2</i>   | 0.029                              | 0.778   |

## Supplemental Figures

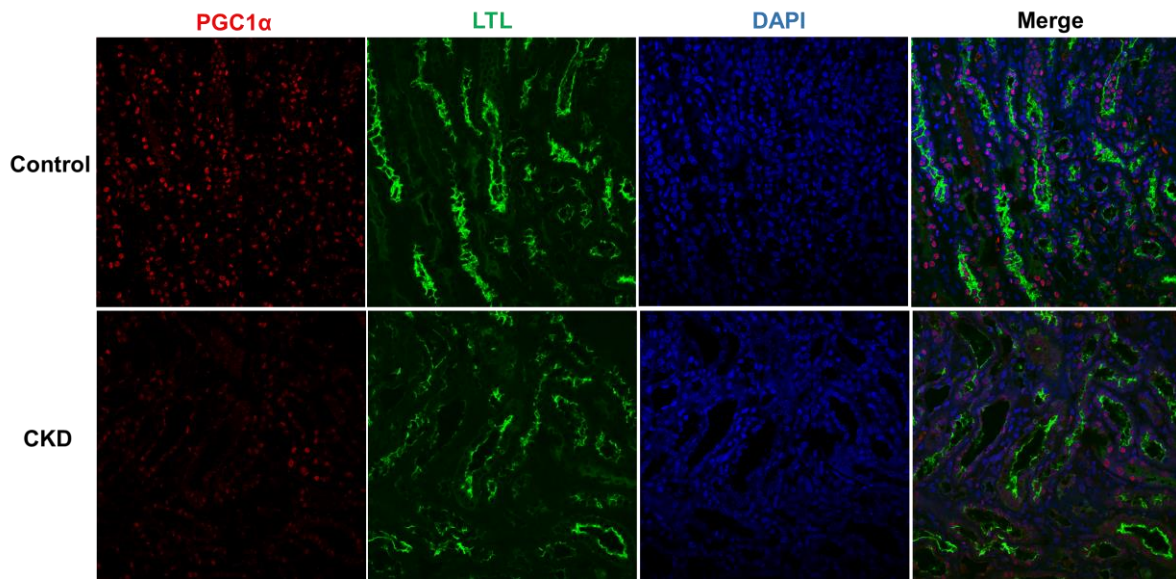

**Figure S1.** Double immunofluorescence study using lotus tetragonolobus lectin (LTL), a proximal tubule marker, in normal healthy kidney and CKD.

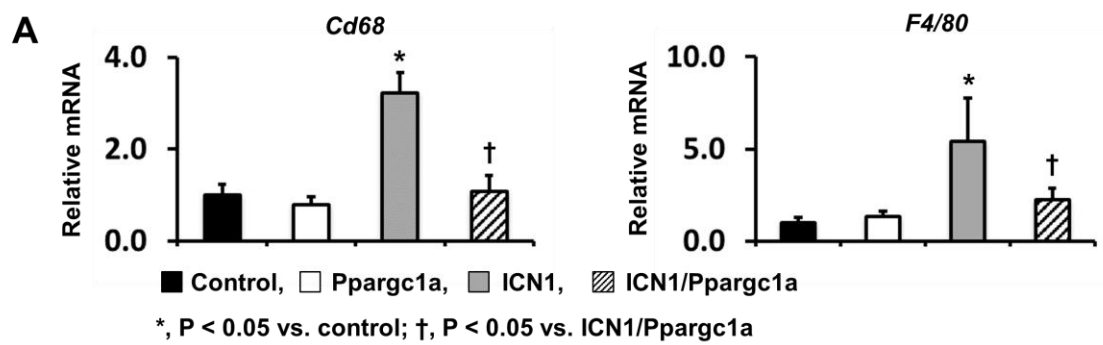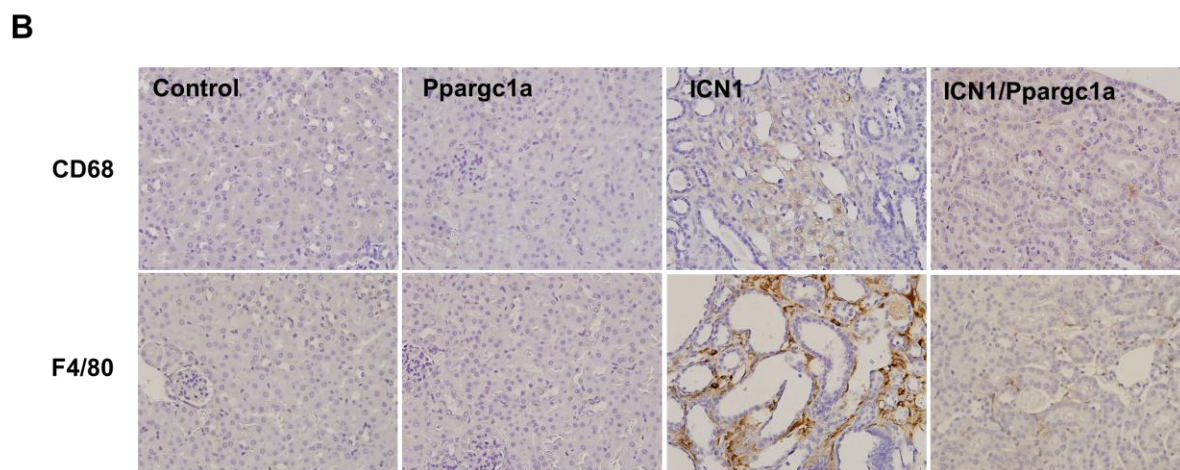

**Figure S2.** (A) Relative mRNA level of *Cd68* and *F4/80* in whole kidneys lysates of control, *Pax8-rtTA/tetO-Ppargc1a*, *Pax8-rtTA/tetO-ICN1*, and *Pax8-rtTA/tetO-ICN1/tetO-Ppargc1a* mice. (B) Representative images of immunohistochemical staining for CD68 and F4/80 in the same mice.

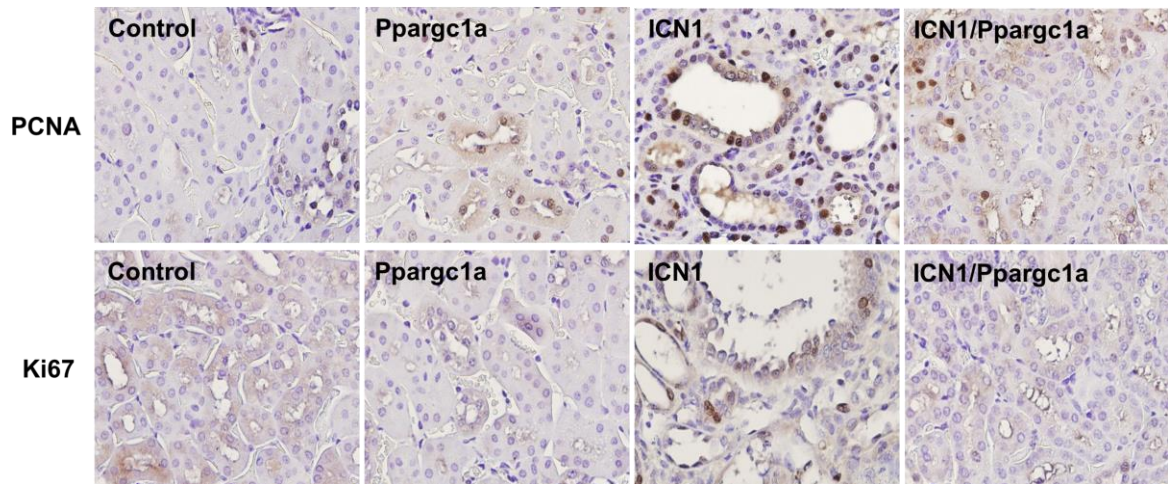

**Figure S3.** Representative images of immunohistochemical staining for PCNA and Ki67 in *control*, *Pax8-rtTA/tetO-Ppargc1a*, *Pax8-rtTA/tetO-ICN1*, and *Pax8-rtTA/tetO-ICN1/tetO-Ppargc1a* mice.
